# Supplementary material
Source: HighWire-hosted journal article supplement (https://www.cmajopen.ca/highwire/filestream/88006/field_highwire_adjunct_files/1/open-2021-0038-checklist.pdf)
Supplement: open-2021-0038-checklist.pdf [file open-2021-0038-checklist.pdf]

Table 1. Clinical Practice Guideline Methodology: AGREE II CHECKLIST<sup>21, 33</sup>

| AGREE II                                   | Reporting Criteria                                                                                             | Planned Guidelines Protocol                                                                                                                                                                                                                                                                                                                                                                                                                            |
|--------------------------------------------|----------------------------------------------------------------------------------------------------------------|--------------------------------------------------------------------------------------------------------------------------------------------------------------------------------------------------------------------------------------------------------------------------------------------------------------------------------------------------------------------------------------------------------------------------------------------------------|
| Domain 1: Scope and Purpose                |                                                                                                                |                                                                                                                                                                                                                                                                                                                                                                                                                                                        |
| 1. Guideline Objectives                    | Health intent, expected benefit and targets                                                                    | <ul style="list-style-type: none"> <li>To provide information and recommendations for women and their physicians when making decisions about the diagnosis, prevention/ risk reduction, management and outcomes related to BCRL in women</li> </ul>                                                                                                                                                                                                    |
| 2. Questions                               | Target population<br>Interventions/ exposures<br>Outcomes<br>Context                                           | <ul style="list-style-type: none"> <li>Women with breast cancer with/ at risk of developing lymphedema</li> <li>Diagnosis, risk reduction, management and outcomes</li> <li>Improve the care of women with BCRL; focus on self-management</li> <li>Canadian Healthcare system</li> </ul>                                                                                                                                                               |
| 3. Population                              | Target population<br>Clinical condition<br>Severity of disease                                                 | <ul style="list-style-type: none"> <li>Adult women with breast cancer and their physicians</li> <li>Breast cancer – from diagnosis to palliative stages</li> <li>Lymphedema – all stages and severity of the condition</li> </ul>                                                                                                                                                                                                                      |
| Domain 2: Stakeholder Involvement          |                                                                                                                |                                                                                                                                                                                                                                                                                                                                                                                                                                                        |
| 4. Group membership                        | Participants<br>Membership expertise<br>Institutions/ organizations<br>Geographical location<br>Members' roles | <ul style="list-style-type: none"> <li>Guideline Development Group: Researchers, clinicians, specialist and patient representatives from across Canada.</li> <li>Partners: Canadian Physiotherapy Association Oncology Division, CancerControl Alberta's Guideline Resource Unit (GURU) and the Canadian Lymphedema Framework</li> <li>Member roles will be defined and shared.</li> </ul>                                                             |
| 5. Target population preferences and views | Patients' views and preferences                                                                                | <ul style="list-style-type: none"> <li>Patient representatives on Guideline Development Group</li> <li>Literature review of patient values and preferences</li> <li>Survey, focus groups and consultation with patient groups</li> </ul>                                                                                                                                                                                                               |
| 6. Target Users                            | Intended audience<br>Use of guidelines                                                                         | <ul style="list-style-type: none"> <li>Physicians as well as women with, and at risk of breast cancer related lymphedema</li> <li>Inform clinical decisions and standards of care</li> </ul>                                                                                                                                                                                                                                                           |
| Domain 3: Rigour of Development            |                                                                                                                |                                                                                                                                                                                                                                                                                                                                                                                                                                                        |
| 7. Search methods                          | Electronic databases; time periods of searches; search strategy                                                | <ul style="list-style-type: none"> <li>MEDLINE, PubMed, EMBASE, SCOPUS, CINAHL, Dissertation Abstracts, PEDro, Occupational Therapy Systematic Evaluation of Evidence, EBM Reviews, Agency for Healthcare Research and Quality, and the National Guideline Clearing House</li> <li>Guidelines and Systematic Reviews: last 5 years; RCTs: 2000-present</li> <li>Further details on the search terms and strategy are provided in Appendix A</li> </ul> |

|                                                              |                                                                                     |                                                                                                                                                                                                                                                                                                                                                                                                                                                                                                                                                                   |
|--------------------------------------------------------------|-------------------------------------------------------------------------------------|-------------------------------------------------------------------------------------------------------------------------------------------------------------------------------------------------------------------------------------------------------------------------------------------------------------------------------------------------------------------------------------------------------------------------------------------------------------------------------------------------------------------------------------------------------------------|
| 8. Evidence selection criteria                               | Target population; study design; outcomes; languages                                | <ul style="list-style-type: none"> <li>Breast cancer related lymphedema</li> <li>Clinical Practice Guidelines; Systematic Reviews; Cross-sectional studies (diagnosis); Cohort Studies (prognosis); RCTs (treatment/ management)</li> <li>Diagnosis/assessment; risk reduction/ prevention; management/treatment; outcomes/ surveillance</li> <li>No language restrictions</li> </ul>                                                                                                                                                                             |
| 9. Strengths and limitations of evidence                     | Study methodology to evaluate quality                                               | <ul style="list-style-type: none"> <li>Clinical Practice Guidelines: AGREE II appraisal; Systematic Reviews: AMSTAR; Cross-sectional studies: AXIS Tool; Cohort Studies: Newcastle-Ottawa Scale; RCTs: risk of bias</li> <li>Rating of evidence: Creation of tables reflecting: Grading of Recommendations, Assessment, Development and Evaluation (GRADE): Tables detailing the level of evidence, consistency of results, direction of results, magnitude of benefit (versus harm) and applicability to practice context in Canada will be developed</li> </ul> |
| 10. Formulation of recommendations                           | Recommendation development process                                                  | <ul style="list-style-type: none"> <li>Use of ADAPTE for incorporating recommendations from existing guidelines.</li> <li>Non-contentious findings: Voting of Steering Committee in the situation where the level of evidence and benefit/harm is established, findings are consistent across studies, and the recommendation is applicable to the Canadian context</li> <li>Contentious findings or in case of no evidence: stakeholder consensus on recommendation or explanation of reasons if consensus cannot be reached</li> </ul>                          |
| 11. Consideration of health benefits, side effects and risks | Data supporting benefits, harms/ side effects, balance of benefits/ harms           | <ul style="list-style-type: none"> <li>Tables will be developed to outline the benefits and risks</li> <li>Recommendations will consider the balance between benefits/ risks as appropriate</li> </ul>                                                                                                                                                                                                                                                                                                                                                            |
| 12. Link between recommendations and evidence                | Link between evidence and recommendations                                           | <ul style="list-style-type: none"> <li>The recommendations will be supported by the level of evidence, extent of the evidence (total number of studies and total number of subjects), direction of effect, magnitude of effect, and where possible, with consideration given to the stage and severity of lymphedema</li> </ul>                                                                                                                                                                                                                                   |
| 13. External review                                          | Purpose and intent of external review                                               | <ul style="list-style-type: none"> <li>Feedback from external experts and stakeholder groups will be solicited to improve the CPG quality, and to obtain feedback on the draft recommendations</li> </ul>                                                                                                                                                                                                                                                                                                                                                         |
| 14. Updating procedure                                       | Statement on when the CPG will be updated                                           | <ul style="list-style-type: none"> <li>The steering group will determine the timeline and outline criteria for future updates</li> </ul>                                                                                                                                                                                                                                                                                                                                                                                                                          |
| Domain 4: Clarity of Presentation                            |                                                                                     |                                                                                                                                                                                                                                                                                                                                                                                                                                                                                                                                                                   |
| 15. Specific and unambiguous recommendations                 | Recommendations are specific with circumstances and relevant populations identified | <ul style="list-style-type: none"> <li>Recommendations will be presented with a clear purpose and in an actionable statement format</li> <li>Areas of uncertainty, and those requiring further research will be identified</li> <li>A lay summary of the findings will be shared with stakeholder groups</li> </ul>                                                                                                                                                                                                                                               |

|                                              |                                                                       |                                                                                                                                                                                                                                                                                                                                                                      |
|----------------------------------------------|-----------------------------------------------------------------------|----------------------------------------------------------------------------------------------------------------------------------------------------------------------------------------------------------------------------------------------------------------------------------------------------------------------------------------------------------------------|
| 16. Management options                       | Describe management options for the condition                         | <ul style="list-style-type: none"> <li>Management options will be articulated given the Canadian Healthcare context, and the focus on self-management of lymphedema</li> </ul>                                                                                                                                                                                       |
| 17. Identifiable key recommendations         | Easily identified key recommendations                                 | <ul style="list-style-type: none"> <li>Key recommendations will be highlighted in an executive summary</li> <li>Algorithms and flow charts will be created to highlight findings</li> </ul>                                                                                                                                                                          |
| Domain 5: Applicability                      |                                                                       |                                                                                                                                                                                                                                                                                                                                                                      |
| 18. Facilitators and barriers to application | Description of the facilitators and barriers to the CPG's application | <ul style="list-style-type: none"> <li>Information on barriers and facilitators to the CPG will be sought at the draft CPG stage</li> <li>The CPG will be evaluated in Alberta Canada prior to national implementation</li> </ul>                                                                                                                                    |
| 19. Implementation advice/tools              | Tools to support application of the CPG                               | <ul style="list-style-type: none"> <li>Materials will be created to support CPG implementation</li> <li>Short videos will be created for healthcare professionals and patients – videos will be housed on the Oncology Division of the Canadian Physiotherapy Association and Canadian Lymphedema Framework websites.</li> </ul>                                     |
| 20. Resource implications                    | Potential resource implications of recommendations                    | <ul style="list-style-type: none"> <li>Where possible, costs related to diagnosis and management will be collected</li> <li>Costs will be considered within the Canadian context</li> </ul>                                                                                                                                                                          |
| 21. Monitoring/auditing criteria             | Provide auditing criteria                                             | <ul style="list-style-type: none"> <li>Operational definitions will be determined to inform auditing and measurement of impact</li> </ul>                                                                                                                                                                                                                            |
| Domain 5: Editorial Independence             |                                                                       |                                                                                                                                                                                                                                                                                                                                                                      |
| 22. Funding body                             | Influence of funding body on guideline recommendations                | <ul style="list-style-type: none"> <li>Initial funding for the stakeholders meeting was received from the Oncology Division of the Canadian Physiotherapy Association</li> <li>The CPG will be completed without influence from any funding body</li> </ul>                                                                                                          |
| 23. Competing interests                      | All group members must declare competing interests                    | <ul style="list-style-type: none"> <li>All CPG guideline members will be required to provide written documentation declaring any competing interests</li> <li>Individuals associated with industry, private business or declaring other competing interests that could influence the guideline process or development will not be eligible to participate</li> </ul> |
